# Supplementary material for: Influence of Photoinitiator Type and Curing Conditions on the Photocuring of Soft Polymer Network
Source: MDPI journal article supplement (doi:10.3390/ma16237348), 2023-11-25
Supplement: s1 [file s1]

# **Influence of photoinitiator type and curing conditions on the photocuring of soft polymer network**

Malwina Niedźwiedź, Gokhan Demirci, Nina Kantor-Malujdy, Mirosława El Fray\*

Department of Polymer and Biomaterials Science, Faculty of Chemical Technology and Engineering, West Pomeranian University of Technology in Szczecin, Al. Piastów 45, 70-311 Szczecin, POLAND

\*e-mail: mirfray@zut.edu.pl

## **SUPPORTING INFORMATION**

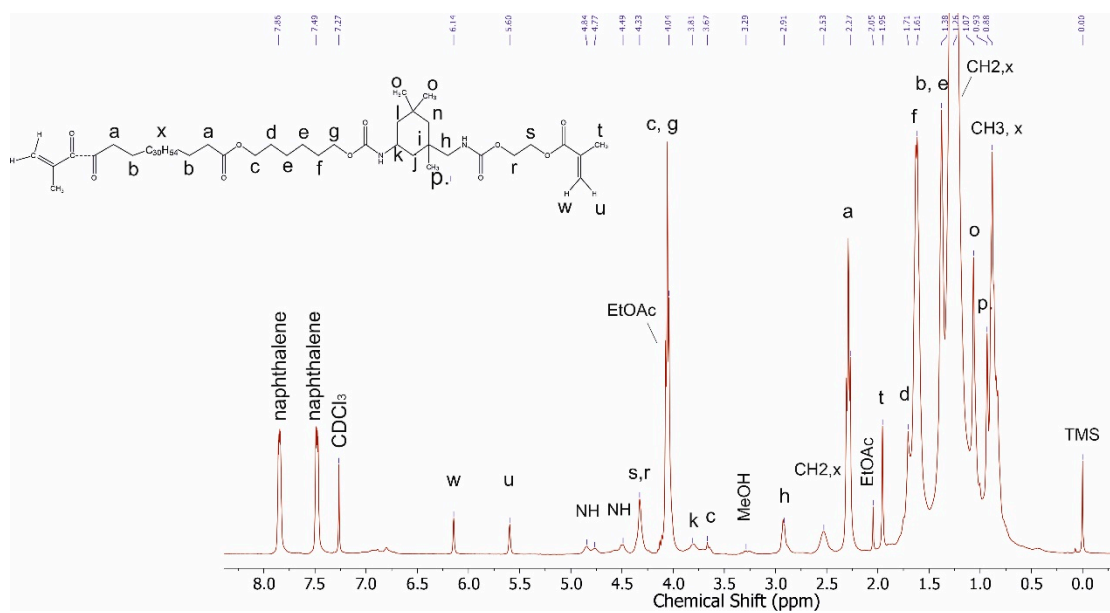

Figure S1 <sup>1</sup>H NMR of ester-urethane macromonomer

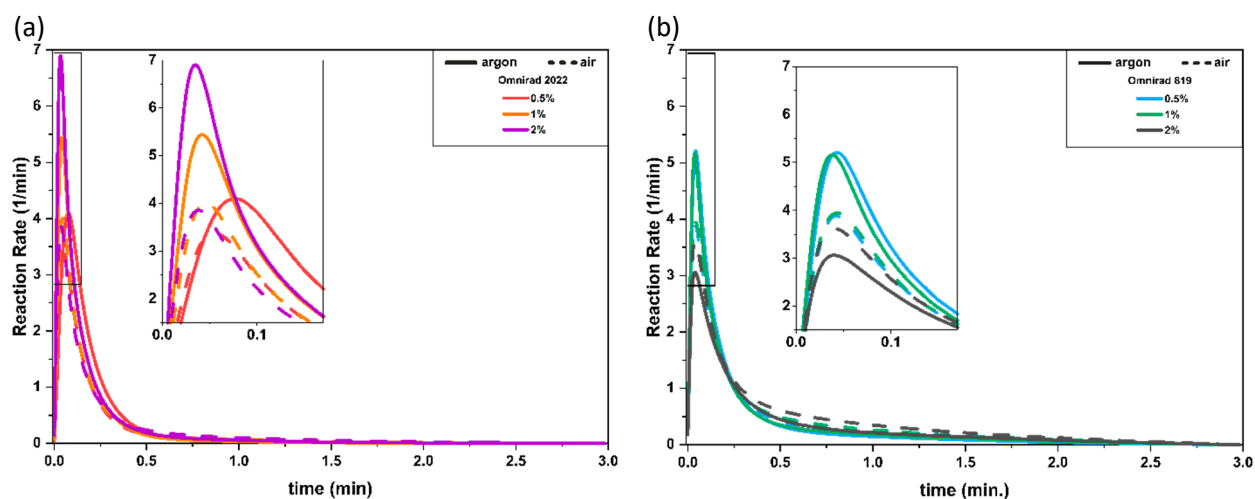

Figure S2 Reaction rate as a function of time for different concentrations 0.5, 1, and 2% wt. of photoinitiator Omnirad 2022 (a) and Omnirad 819 (b) at 20 mW/cm<sup>2</sup>

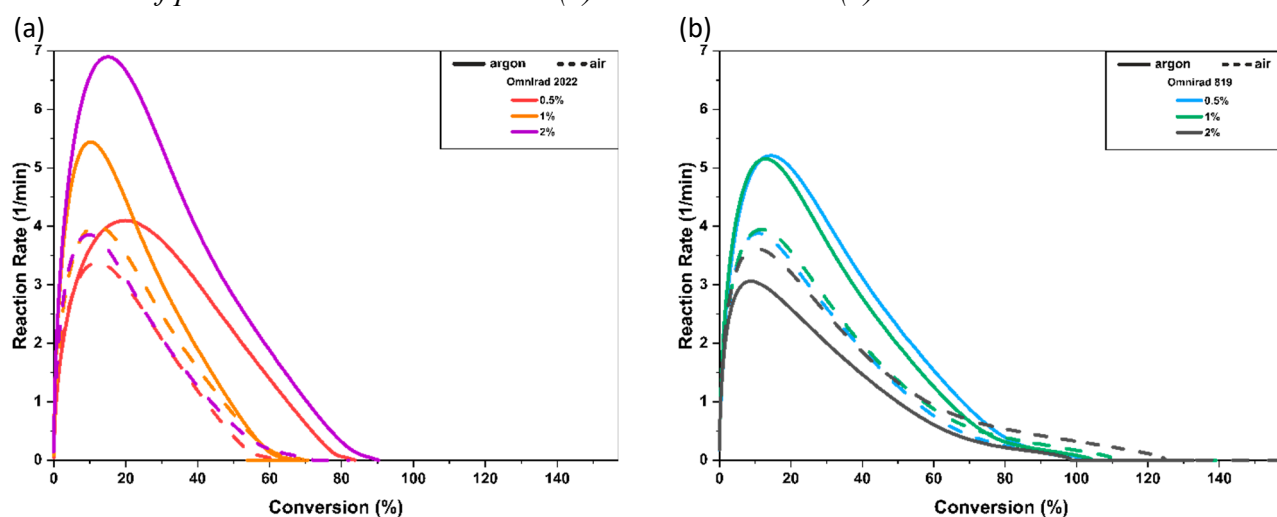

Figure S3 Reaction rate as a function of conversion for different concentrations 0.5, 1, and 2% wt. of photoinitiator Omnirad 2022 (a) and 819 (b) at 20 mW/cm<sup>2</sup>

(a)

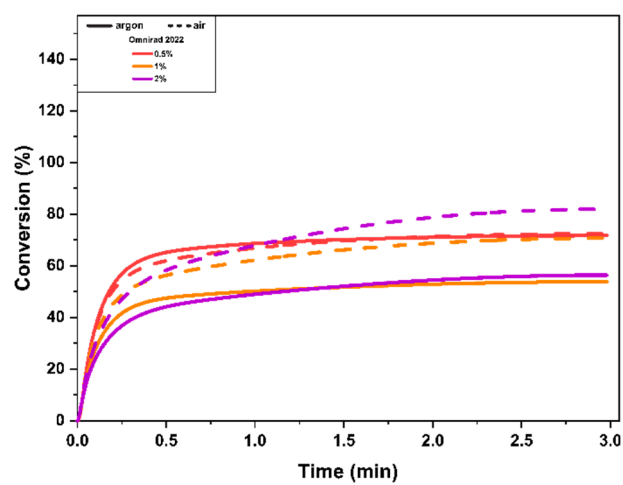

(b)

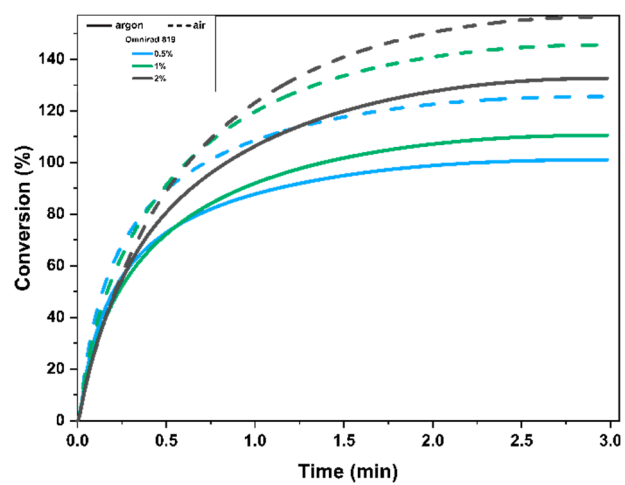

Figure S4 Monomer conversion as a function of time for different concentrations 0.5, 1 and 2% wt. of photoinitiator Omnirad 2022 (a) and 819 (b) at 50mW/cm<sup>2</sup>

(a)

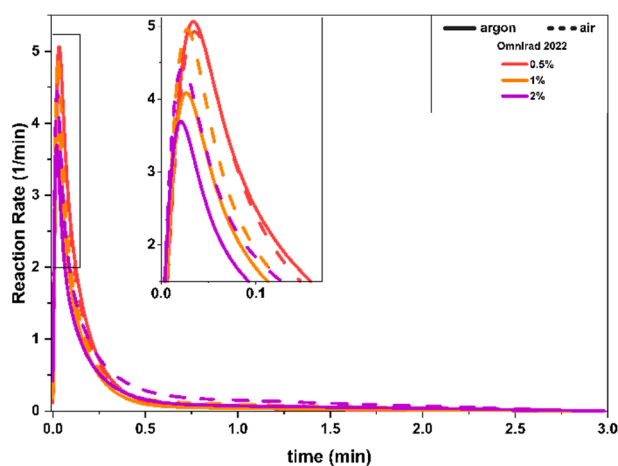

(b)

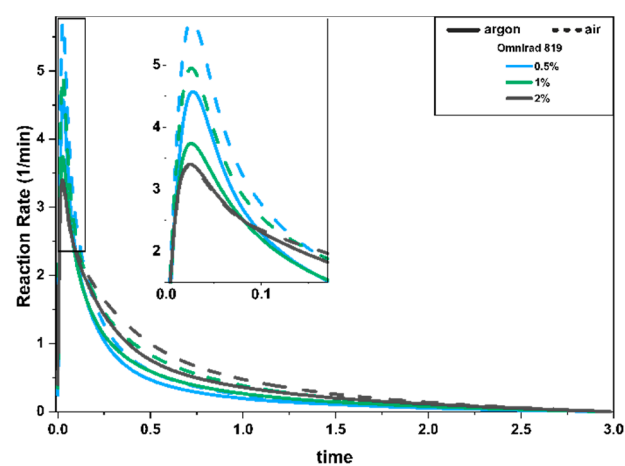

Figure S5 Reaction rate as a function of time for different concentrations 0.5, 1 and 2% wt. of photoinitiator Omnirad 2022 (a) and 819 (b) at  $50 \text{ mW/cm}^2$

(a)

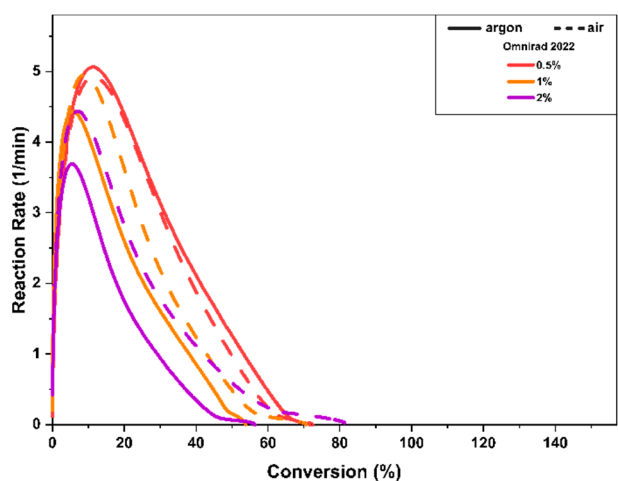

(b)

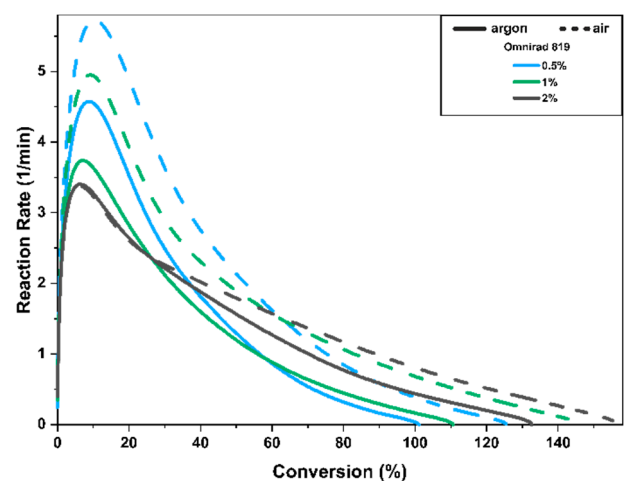

Figure S6 Reaction rate as a function of conversion for different concentrations 0.5, 1, and 2% wt. of photoinitiator Omnirad 2022 (a) and 819 (b) at  $50 \text{ mW/cm}^2$

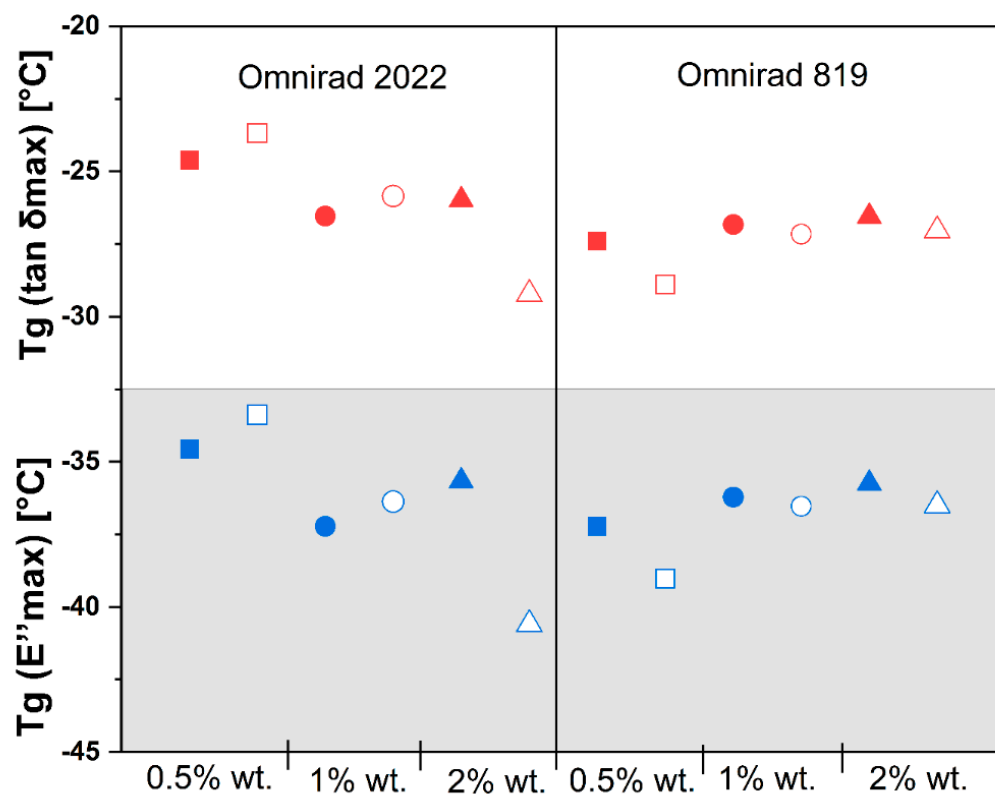

Figure S7 Glass transition temperature of samples cured in argon (closed symbols) and air atmospheres (open symbols) with the use of  $20 \text{ mW/cm}^2$  light intensity.

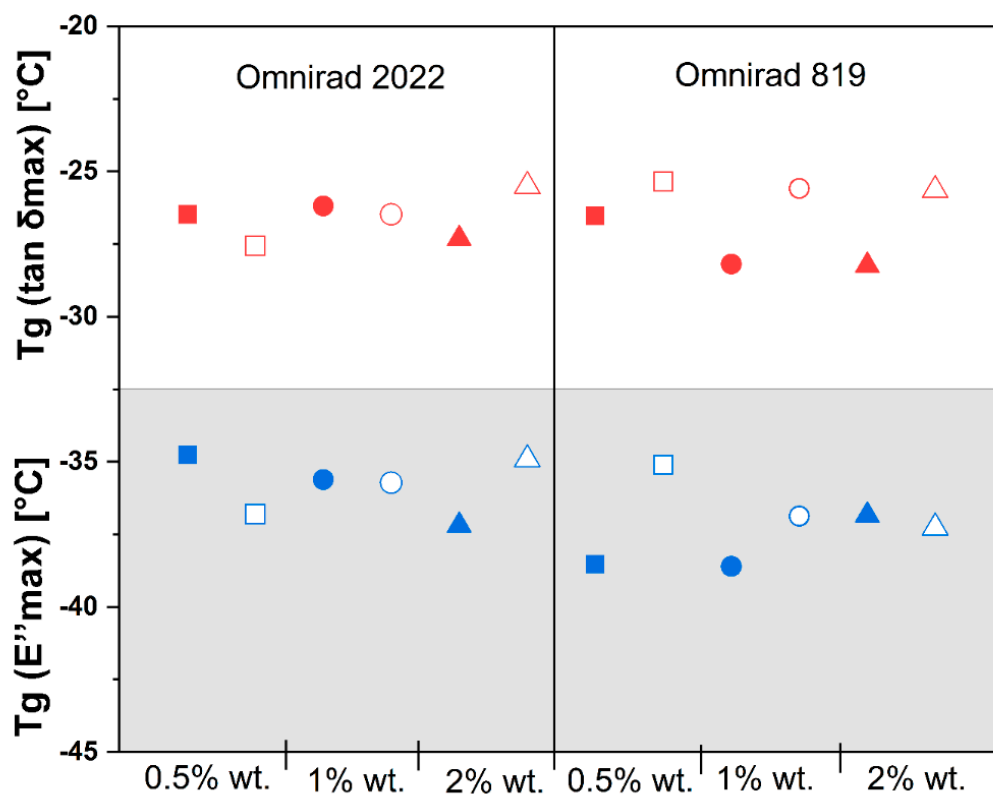

Figure S8 Glass transition temperature of samples cured in argon (closed symbols) and air atmospheres (open symbols) with the use of 50 mW/cm<sup>2</sup> light intensity.

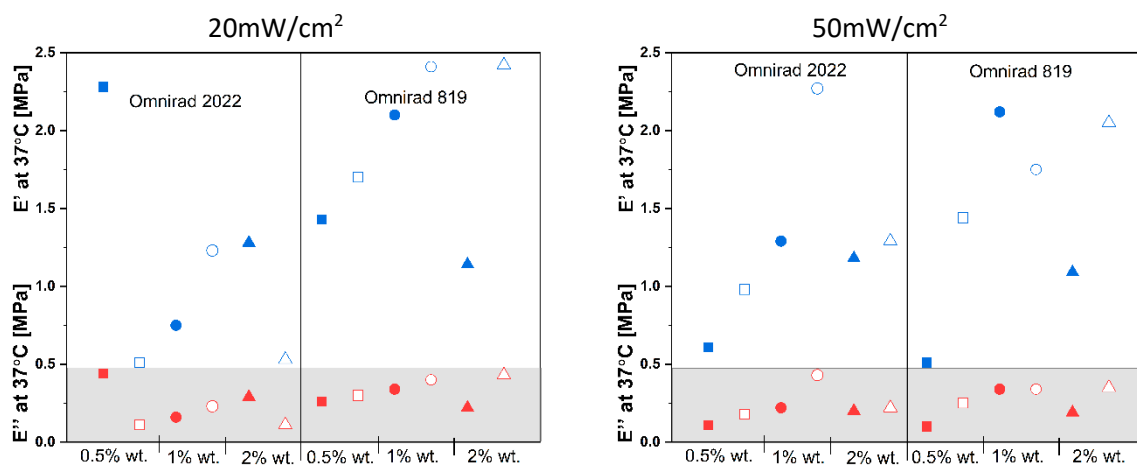

Figure S9 Storage (blue) and loss (red) modulus at 37°C of samples cured in argon (closed symbols) and air atmospheres (open symbols)

Table S1 Parameters of the photopolymerization process at a light intensity of 20 mW/cm<sup>2</sup>

| photoinitiator | Concentration of photoinitiator [%wt.] | atmosphere | t <sub>1/2</sub> [min] | Entalpia [J/g] | C <sub>max</sub> [%] | R <sub>max</sub> [1/min] | C <sub>u</sub> [%] | T <sub>max</sub> |
|----------------|----------------------------------------|------------|------------------------|----------------|----------------------|--------------------------|--------------------|------------------|
| Omnirad 2022   | 0.5                                    | Argon      | 0.14±0.01              | 17.68±0.49     | 81.9±2.3             | 4.46±0.35                | 17.72±1.84         | 37.7±0.0         |
|                |                                        | Air        | 0.58±0.05              | 13.49±0.01     | 62.5±0.1             | 3.14±0.32                | 11.35±0.98         | 37.6±0.1         |
|                | 1                                      | Argon      | 0.12±0.01              | 16.82±0.19     | 77.8±0.9             | 5.18±0.38                | 13.78±0.47         | 37.7±0.1         |
|                |                                        | Air        | 0.27±0.08              | 15.48±0.68     | 71.7±3.1             | 4.39±0.54                | 12.06±0.05         | 37.7±0.1         |
|                | 2                                      | Argon      | 0.10±0.02              | 18.65±1.20     | 86.3±5.6             | 6.17±1.03                | 14.71±0.58         | 37.8±0.1         |
|                |                                        | Air        | 0.28±0.11              | 16.61±1.51     | 76.9±7.0             | 4.36±0.72                | 10.63±1.19         | 37.7±0.0         |
| Omnirad 819    | 0.5                                    | Argon      | 0.16±0.01              | 22.90±0.93     | 106.0±4.3            | 5.13±0.11                | 13.93±0.88         | 37.8±0.0         |
|                |                                        | Air        | 0.22±0.02              | 21.78±0.62     | 100.9±2.9            | 4.19±0.43                | 11.05±0.71         | 37.7±0.1         |
|                | 1                                      | Argon      | 0.21±0.06              | 23.17±0.87     | 107.3±4.0            | 4.65±0.72                | 11.53±2.00         | 37.8±0.0         |
|                |                                        | Air        | 0.20±0.04              | 25.08±1.52     | 116.1±7.0            | 4.44±0.70                | 11.48±0.36         | 37.7±0.0         |
|                | 2                                      | Argon      | 0.25±0.06              | 20.63±2.54     | 95.5±11.8            | 3.67±0.86                | 9.64±1.32          | 37.6±0.1         |
|                |                                        | Air        | 0.21±0.02              | 26.90±0.14     | 124.5±0.6            | 3.66±0.06                | 11.11±1.26         | 37.7±0.0         |

Table S2 Kinetic parameters of the Sestak-Berggren model for photocrosslinking at a light intensity of 20 mW/cm<sup>2</sup>

| photoinitiator | Concentration of photoinitiator [%wt.] | atmosphere | k         | n         | m         |
|----------------|----------------------------------------|------------|-----------|-----------|-----------|
| Omnirad 2022   | 0.5                                    | Argon      | 0.54±0.07 | 3.39±0.25 | 0.74±0.03 |
|                |                                        | Air        | 0.68±0.21 | 6.12±0.24 | 0.80±0.08 |
|                | 1                                      | Argon      | 0.59±0.03 | 3.80±0.07 | 0.67±0.01 |
|                |                                        | Air        | 0.60±0.01 | 4.85±0.38 | 0.68±0.02 |
|                | 2                                      | Argon      | 0.46±0.02 | 3.03±0.45 | 0.54±0.06 |
|                |                                        | Air        | 0.38±0.01 | 4.32±0.68 | 0.53±0.02 |
| Omnirad 819    | 0.5                                    | Argon      | 0.26±0.00 | 2.43±0.20 | 0.42±0.00 |
|                |                                        | Air        | 0.19±0.02 | 2.55±0.06 | 0.36±0.01 |
|                | 1                                      | Argon      | 0.22±0.03 | 2.73±0.36 | 0.38±0.02 |
|                |                                        | Air        | 0.16±0.01 | 2.11±0.24 | 0.29±0.02 |
|                | 2                                      | Argon      | 0.15±0.05 | 2.42±0.09 | 0.30±0.05 |
|                |                                        | Air        | 0.11±0.01 | 1.73±0.02 | 0.23±0.03 |



Table S3 Parameters of the photopolymerization process at a light intensity of 50 mW/cm<sup>2</sup>

| photoinitiator | Concentration of photoinitiator [%wt.] | atmosphere | t <sub>1/2</sub> [min] | Entalpia [J/g] | C <sub>max</sub> [%] | R <sub>max</sub> [1/min] | C <sub>u</sub> [%] | T <sub>max</sub> |
|----------------|----------------------------------------|------------|------------------------|----------------|----------------------|--------------------------|--------------------|------------------|
| Omnirad 2022   | 0.5                                    | Argon      | 0.24±0.07              | 15.01±0.67     | 69.5±3.1             | 4.84±0.31                | 10.51±0.59         | 38.0±0.0         |
|                |                                        | Air        | 0.38±0.18              | 14.84±1.14     | 68.7±5.3             | 4.64±0.4                 | 10.2±1.45          | 38.0±0.0         |
|                | 1                                      | Argon      | 2.06±1.15              | 10.95±0.05     | 50.7±4.4             | 3.91±0.26                | 7.01±0.46          | 37.9±0.0         |
|                |                                        | Air        | 0.38±0.01              | 15.15±0.15     | 70.2±0.7             | 5.03±0.11                | 8.5±0.03           | 38±0.0           |
|                | 2                                      | Argon      | 1.26±0.01              | 12.11±0.10     | 56.1±0.4             | 3.67±0.03                | 5.9±0.24           | 37.5±0.7         |
|                |                                        | Air        | 0.41±0.09              | 16.63±1.53     | 77.0±7.1             | 4.4±0.05                 | 6.94±0.5           | 37.9±0.0         |
| Omnirad 819    | 0.5                                    | Argon      | 0.23±0.03              | 21.8±0.05      | 100.9±0.024          | 4.36±0.30                | 8.2±0.98           | 37.9±0.0         |
|                |                                        | Air        | 0.18±0.04              | 25.17±2.75     | 116.5±12.75          | 5.20±0.74                | 9.2±1.52           | 38.00±0.0        |
|                | 1                                      | Argon      | 0.24±0.01              | 24.80±1.30     | 114.8±6.0            | 4.00±0.36                | 6.9±0.53           | 38.0±0.0         |
|                |                                        | Air        | 0.14±0.04              | 33.89±3.45     | 156.9±16.0           | 6.14±1.68                | 10.4±1.65          | 38.1±0.1         |
|                | 2                                      | Argon      | 0.25±0.04              | 28.34±0.43     | 131.2±2.0            | 3.23±0.25                | 6.5±0.17           | 38.0±0.0         |
|                |                                        | Air        | 0.02±0.01              | 35.76±2.77     | 165.6±12.9           | 3.75±0.52                | 7.0±0.92           | 38.1±0.0         |

*Table S4 Kinetic parameters of the Sestak-Berggren model for photocrosslinking at a light intensity of 50 mW/cm<sup>2</sup>*

| photoinitiator | Concentration of photoinitiator [%wt.] | atmosphere | k         | n         | m         |
|----------------|----------------------------------------|------------|-----------|-----------|-----------|
| Omnirad 2022   | 0.5                                    | Argon      | 0.63±0.03 | 4.99±0.45 | 0.65±0.02 |
|                |                                        | Air        | 0.62±0.02 | 5.55±0.86 | 64±0.01   |
|                | 1                                      | Argon      | 0.84±0.14 | 8.77±1.88 | 0.70±0.05 |
|                |                                        | Air        | 0.52±0.01 | 5.59±0.08 | 0.54±0.00 |
|                | 2                                      | Argon      | 0.36±0.04 | 7.41±0.06 | 0.47±0.04 |
|                |                                        | Air        | 0.23±0.04 | 4.65±0.72 | 0.34±0.03 |
| Omnirad 819    | 0.5                                    | Argon      | 0.12±0.02 | 2.29±0.04 | 0.21±0.03 |
|                |                                        | Air        | 0.13±0.02 | 1.81±0.34 | 0.18±0.01 |
|                | 1                                      | Argon      | 0.07±0.01 | 1.52±0.23 | 0.10±0.05 |
|                |                                        | Air        | 0.11±0.04 | 1.05±0.02 | 0.11±0.03 |
|                | 2                                      | Argon      | 0.05±0.01 | 0.94±0.01 | 0.5±0.03  |
|                |                                        | Air        | 0.05±0.00 | 0.49±0.04 | 0.02±0.01 |

*Table S5 DMTA results*

| Light intensity [mW/cm <sup>2</sup> ] | Photoinitiator | Concentration of photoinitiator [%wt.] | Curing atmosphere | T <sub>g</sub> (E'' <sub>max</sub> ) [°C] | T <sub>g</sub> (tan δ <sub>max</sub> ) [°C] | E' at 37 °C [MPa] | E'' at 37 °C [MPa] | Tan δ at 37 °C |
|---------------------------------------|----------------|----------------------------------------|-------------------|-------------------------------------------|---------------------------------------------|-------------------|--------------------|----------------|
| 20                                    | Omnirad 2022   | 0.5                                    | Air               | -33.38                                    | -23.69                                      | 0.51              | 0.11               | 0.22           |
|                                       |                |                                        | Argon             | -34.56                                    | -24.61                                      | 2.28              | 0.44               | 0.19           |
|                                       |                | 1                                      | Air               | -36.37                                    | -25.85                                      | 1.23              | 0.23               | 0.19           |
|                                       |                |                                        | Argon             | -37.22                                    | -26.54                                      | 0.75              | 0.16               | 0.21           |
|                                       |                | 2                                      | Air               | -40.60                                    | -29.23                                      | 0.53              | 0.11               | 0.21           |
|                                       |                |                                        | Argon             | -35.66                                    | -25.98                                      | 1.28              | 0.29               | 0.22           |
|                                       | Omnirad 819    | 0.5                                    | Air               | -39.02                                    | -28.89                                      | 1.70              | 0.30               | 0.18           |
|                                       |                |                                        | Argon             | -37.22                                    | 27.40                                       | 1.43              | 0.26               | 0.18           |
|                                       |                | 1                                      | Air               | -36.53                                    | -27.16                                      | 2.41              | 0.40               | 0.17           |
|                                       |                |                                        | Argon             | -36.22                                    | -26.83                                      | 2.10              | 0.34               | 0.16           |
|                                       |                | 2                                      | Air               | -36.50                                    | -27.04                                      | 2.42              | 0.43               | 0.18           |
|                                       |                |                                        | Argon             | -35.75                                    | -26.55                                      | 1.14              | 0.22               | 0.19           |
| 50                                    | Omnirad 2022   | 0.5                                    | Air               | -36.80                                    | -27.56                                      | 0.98              | 0.18               | 0.18           |
|                                       |                |                                        | Argon             | -34.76                                    | -26.48                                      | 0.61              | 0.11               | 0.19           |

|  |             |     |       |        |        |      |      |      |
|--|-------------|-----|-------|--------|--------|------|------|------|
|  |             | 1   | Air   | -35.72 | -26.48 | 2.27 | 0.43 | 0.19 |
|  |             |     | Argon | -35.61 | -26.19 | 1.29 | 0.22 | 0.18 |
|  |             | 2   | Air   | -34.92 | -25.51 | 1.29 | 0.22 | 0.21 |
|  |             |     | Argon | -37.19 | -27.32 | 1.18 | 0.20 | 0.17 |
|  | Omnirad 819 | 0.5 | Air   | -35.10 | -25.35 | 1.44 | 0.25 | 0.17 |
|  |             |     | Argon | -38.53 | -26.53 | 0.51 | 0.10 | 0.19 |
|  |             | 1   | Air   | -36.87 | -25.59 | 1.75 | 0.34 | 0.20 |
|  |             |     | Argon | -38.60 | -28.19 | 2.12 | 0.34 | 0.16 |
|  |             | 2   | Air   | -37.27 | -25.65 | 2.05 | 0.35 | 0.17 |
|  |             |     | Argon | -36.84 | -28.24 | 1.09 | 0.19 | 0.17 |
